# Supplementary material for: Effect of Styrene-Diene Block Copolymers and Glass Bubbles on the Post-Consumer Recycled Polypropylene Properties
Source: PubMed Central journal article supplement (PMC7040787; doi:10.3390/ma13030543), 2020-01-23
Supplement: materials-13-00543-s001.pdf [file materials-13-00543-s001.pdf]

# Supplementary Materials: Effect of Styrene-Diene Block Copolymers and Glass Bubbles on the Post-Consumer Recycled Polypropylene Properties

Maria Rapa, Bogdan Norocel Spurcaci<sup>\*</sup>, George Coman, Cristian Andi Nicolae, Augusta Raluca Gabor, Paul Nicolae Ghioca, Andrei Constantin Berbecaru, Ecaterina Matei<sup>\*</sup> and Cristian Predescu

**Table S1.** Molecular weight of SBS and SIS synthesized by anionic polymerization.

| Property                             | U.M.  | SBS     | SIS     |
|--------------------------------------|-------|---------|---------|
| Polystyrene content                  | %     | 31.8    | 30.4    |
| Molecular weight                     | g/mol | 190,000 | 123,500 |
| Polystyrene block molecular weight   | g/mol | 15,650  | 18,800  |
| Polybutadiene block molecular weight | g/mol | 128,200 | -       |
| Polyisoprene block molecular weight  | g/mol | -       | 85,900  |

**Table S2.**  $A_{998\text{ cm}^{-1}}/A_{974\text{ cm}^{-1}}$  estimated from FTIR spectra.

| Sample        | $A_{998\text{ cm}^{-1}}/A_{974\text{ cm}^{-1}}$ |
|---------------|-------------------------------------------------|
| rPP           | 0.64                                            |
| rPP/SBS       | 0.36                                            |
| rPP/SBS/GB 5  | 0.28                                            |
| rPP/SBS/GB 20 | 0.18                                            |
| rPP/SIS       | 0.30                                            |
| rPP/SIS/GB 5  | 0.22                                            |
| rPP/SIS/GB 20 | 0.16                                            |

**Table S3.** data for loss modulus,  $\tan \delta$  and storage modulus for post-consumer rPP/SBS, rPP/SIS, rPP/SBS/GB, rPP/SIS/GB composites compared with that of post-consumer rPP.

| Sample        | Loss Modulus<br>( $E''$ -Peak) |        | Tan Delta<br>( $\tan \delta$ (max) Peak) |        | Storage Modulus (MPa) |       |        |
|---------------|--------------------------------|--------|------------------------------------------|--------|-----------------------|-------|--------|
|               | Temperature                    | Height | Temperature                              | Height | Temperature           |       |        |
|               | °C                             | MPa    | °C                                       | MPa    | 30 °C                 | 90 °C | 130 °C |
| rPP           | 48.85                          | 89.87  | 118.55                                   | 0.1906 | 1187                  | 402.9 | 120.9  |
| rPP/SBS       | 55.93                          | 77.28  | 127.31                                   | 0.1997 | 987.9                 | 313.4 | 93.48  |
| rPP/SBS/GB 5  | 51.78                          | 78.59  | 124.08                                   | 0.1911 | 961.5                 | 313.4 | 95     |
| rPP/SBS/GB 20 | 54.37                          | 77.29  | 127.87                                   | 0.1918 | 971.7                 | 326.2 | 101.1  |
| rPP/SIS       | 53.84                          | 72.91  | 128.5                                    | 0.2064 | 942.3                 | 289.3 | 85.18  |
| rPP/SIS/GB 5  | 51.61                          | 72.47  | 122.18                                   | 0.1833 | 911.4                 | 287.4 | 88.06  |
| rPP/SIS/GB 20 | 44.19                          | 79.06  | 126.49                                   | 0.184  | 992.4                 | 330.8 | 103.2  |

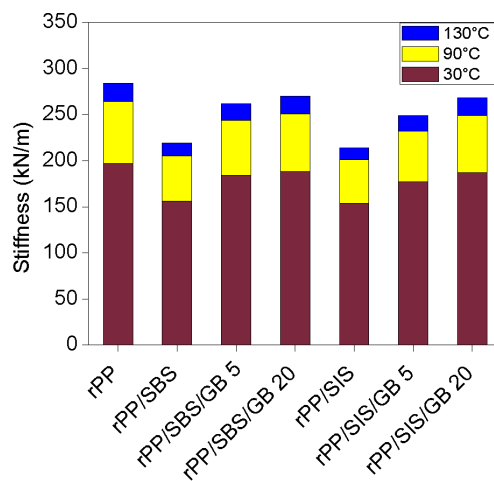

**Figure S1.** Stiffness for post-consumer rPP loaded with styrene-butadiene-styrene/styrene-isoprene-styrene block-copolymers at 30 °C, 90 °C, and 130 °C.

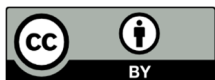

© 2020 by the authors. Licensee MDPI, Basel, Switzerland. This article is an open access article distributed under the terms and conditions of the Creative Commons Attribution (CC BY) license (<http://creativecommons.org/licenses/by/4.0/>).
